# Supplementary material for: Targeting RACK1 to alleviate TDP-43 and FUS proteinopathy-mediated suppression of protein translation and neurodegeneration
Source: PubMed Central journal article supplement (PMC10726565; doi:10.1186/s40478-023-01705-8), 2023-12-18
Supplement: 40478_2023_1705_MOESM1_ESM.pdf [file 40478_2023_1705_MOESM1_ESM.pdf]

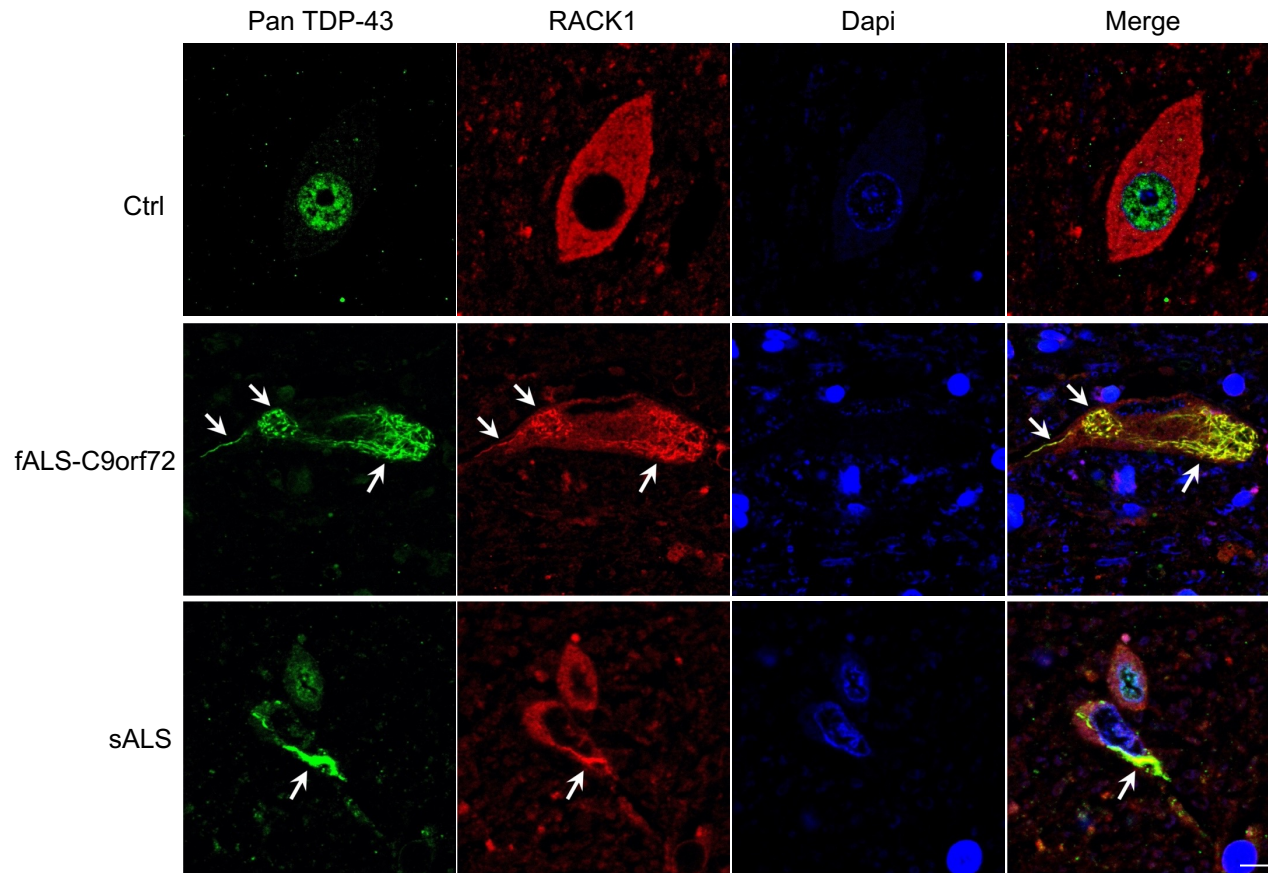

**Fig. S1 RACK1 and TDP-43 co-aggregate in ALS spinal cord motor neurons.** Representative images of immunohistochemical analysis showing co-aggregation of RACK1 with TDP-43 in the cytoplasm (*arrows*) in spinal cord sections of C9orf72-linked familial ALS (fALS) and sporadic ALS ((sALS) cases, in contrast to normal nuclear expression of TDP-43 in control spinal cords (Ctrl). Scale bar: 10  $\mu$ m.

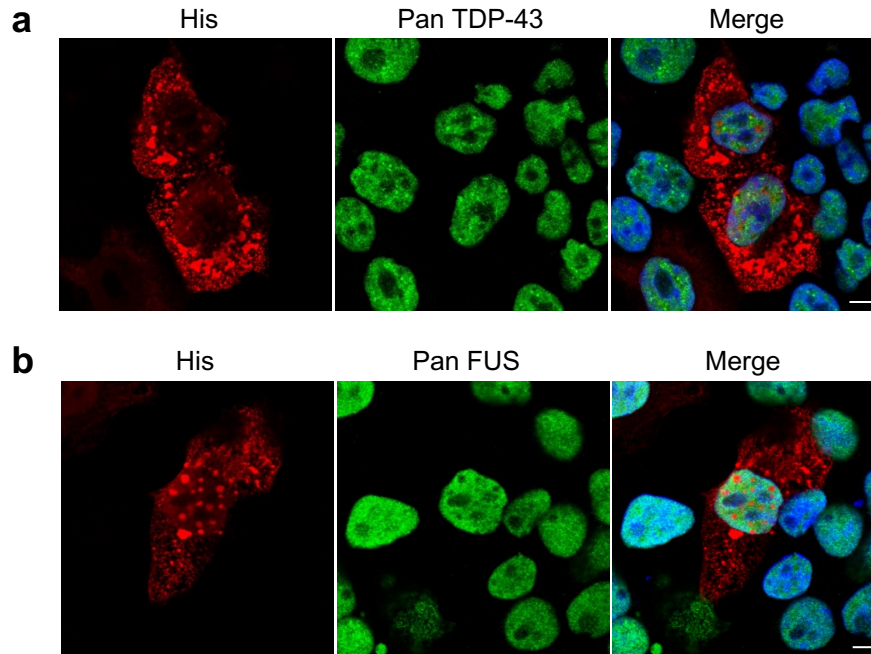

**Fig. S2 Endogenous TDP-43 and FUS expressions are not affected by mutant RACK1.** Immunocytochemical analysis shows His-tagged DE-RACK1-containing aggregates do not alter the normal nuclear expressions of endogenous TDP-43 (a) and FUS (b) in HEK293T cells. Scale bars: 20  $\mu\text{m}$ .

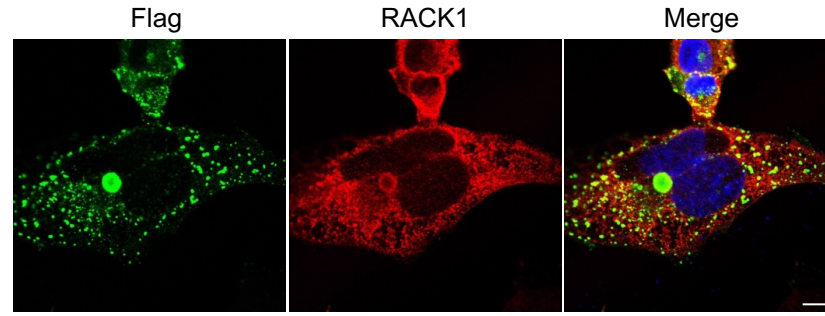

**Fig. S3 RACK1 does not co-aggregate with mutant DISC1.** Immunocytochemical analysis shows minimal association of Flag-tagged 10W/S-DISC1 mutant aggregates with endogenous RACK1 in HEK293T cells. Scale bar: 20  $\mu\text{m}$ .

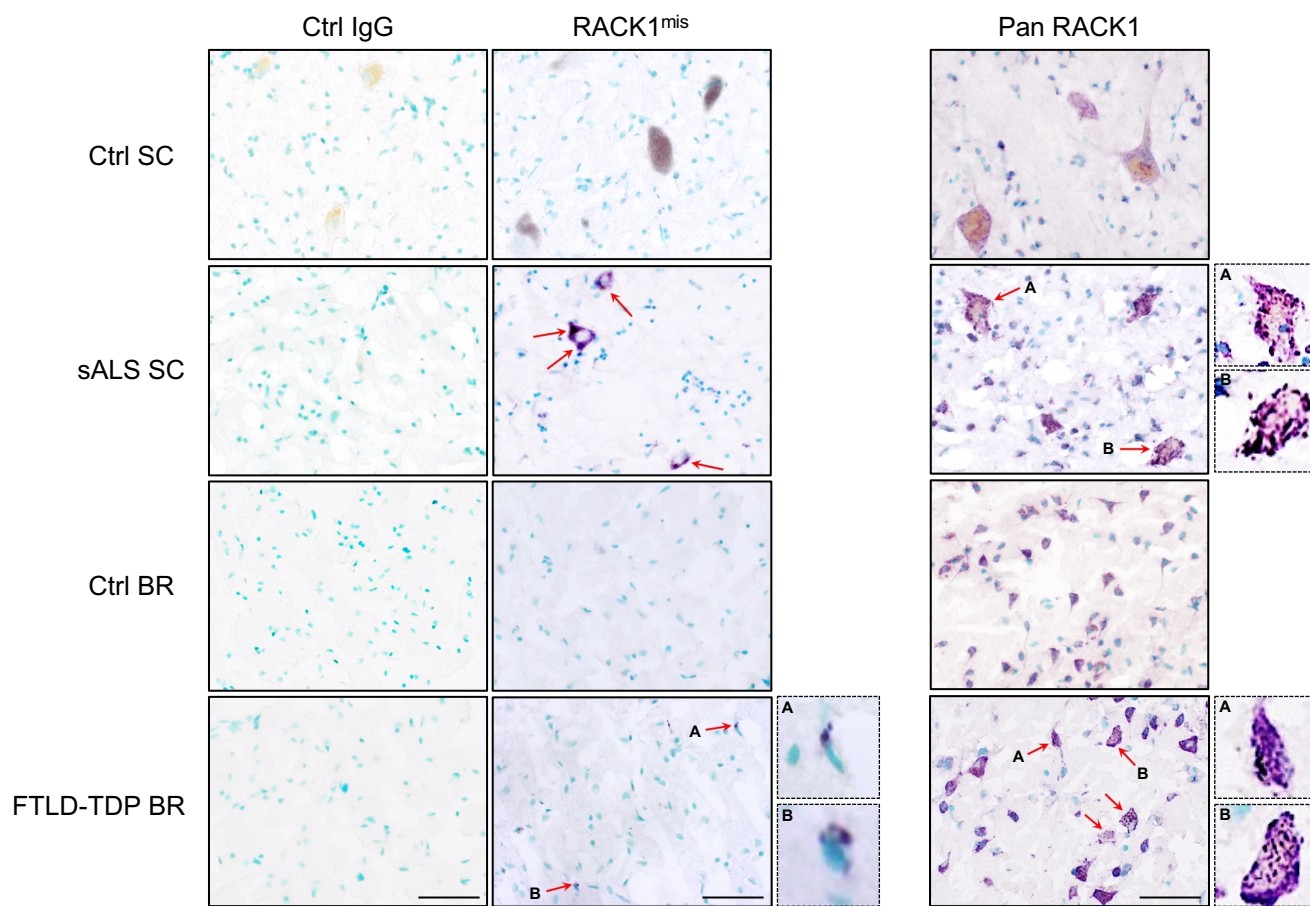

**Fig. S4 RACK1 is misfolded in ALS spinal cord and FTLD-TDP brain tissues.** Immunohistochemical analysis demonstrates the immunoreactivity of RACK1 misfolding-specific antibody “RACK1<sup>mis</sup>” with cytoplasmic aggregates in sporadic ALS spinal cord (sALS, SC) and FTLD-TDP brain (BR) (*arrows*) with no reactivity in corresponding control (Ctrl) tissues. Pan RACK1 antibody reacts with both aggregated and normal RACK1 in all tissues. Scale bars: 50  $\mu$ m.

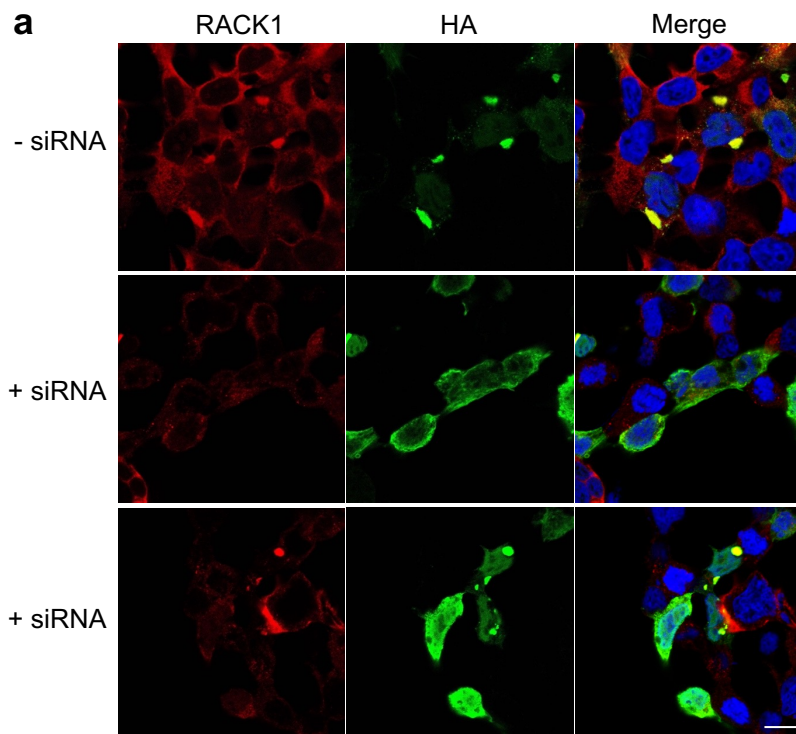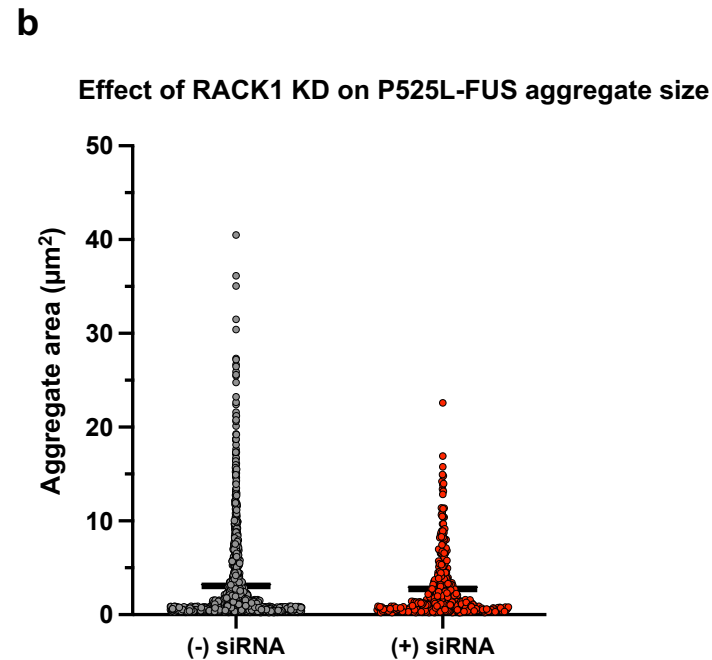

**Fig. S5 RACK1 knockdown reduces cytoplasmic aggregation of P525L-FUS in HEK293T cells.** (a) Representative images showing that in contrast to control cells where distinctive aggregates of HA-tagged P525L-FUS induce RACK1 co-aggregation in the cytoplasm (*top row*, -siRNA), RACK1 KD not only ameliorates cytoplasmic aggregation (*middle row*) but also leads to nuclear localization of P525L-FUS in a sub-population of transfected cells (*bottom row*). (b) Quantification shows a trend for RACK1 to reduce the average size of P525L-FUS aggregates in each individual transfected cells, although it does not reach statistical significance ( $p=0.28$ ). *Statistics*: Student's *t*-test unpaired two-tailed. Error bars: SEM. Scale bar: 10  $\mu\text{m}$ .

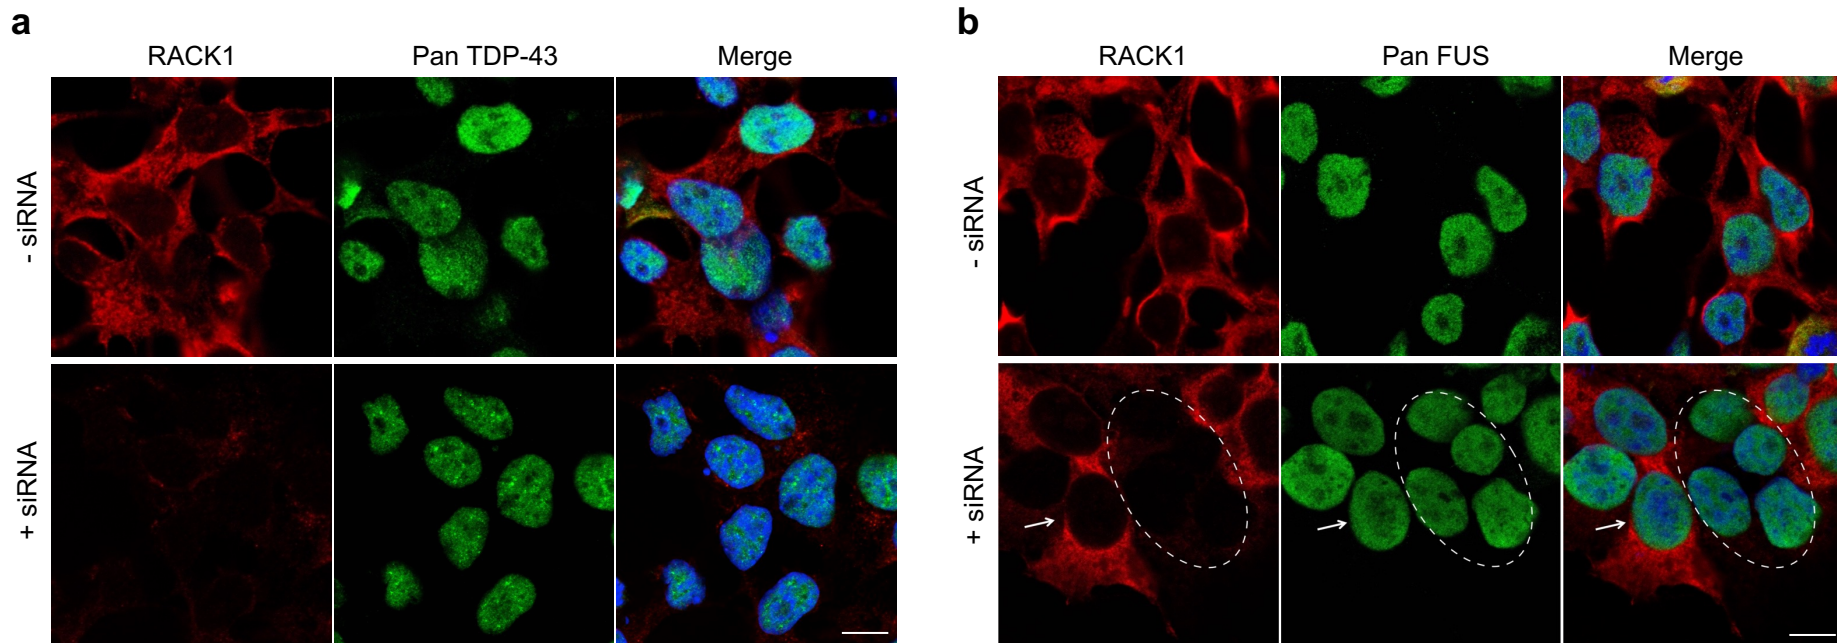

**Fig. S6 Endogenous TDP-43 and FUS expressions are not affected by RACK1 knockdown.** Endogenous TDP-43 (Pan TDP-43) (**a**) and FUS (Pan FUS) (**b**) retain normal nuclear expression upon RACK1 knockdown, similar to control RACK1 expressing cells. In *panel b*, *dashed circles*: cells with RACK1 KD; *arrows*: RACK1 expressing cells for direct comparison within the same field. Scale bars: 10  $\mu\text{m}$ .

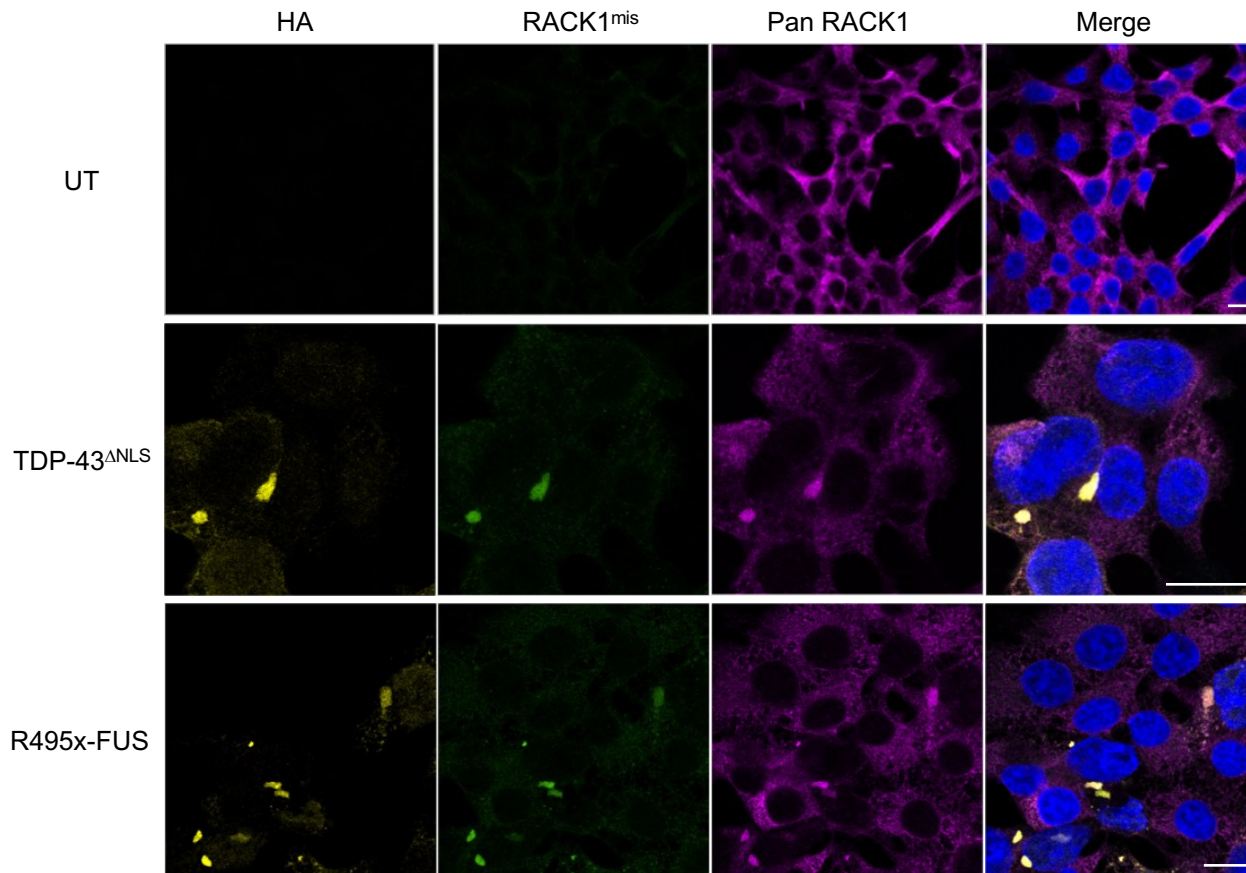

**Fig. S7 Validation of the RACK1<sup>mis</sup> antibody.** Immunocytochemical analysis demonstrates the selective binding pattern of RACK1 misfolding specific antibody “RACK1<sup>mis</sup>”. RACK1<sup>mis</sup> reacts with RACK1 in cytoplasmic aggregates of HA-tagged TDP-43<sup>ΔNLS</sup> (*middle row*) or R495x-FUS (*bottom row*) transfected HEK293T cells but not with diffuse, non-aggregated RACK1 in the cytoplasm (stained by a Pan RACK1 antibody). RACK1<sup>mis</sup> shows no reactivity with endogenous, physiological RACK1 in untransfected (UT, *top row*) cells. Scale bars: 10  $\mu$ m.
